# Supplementary material
Source: bioRxiv or medRxiv preprint supplement (https://www.biorxiv.org/highwire/filestream/92663/field_highwire_adjunct_files/0/301556-1.pdf)
Supplement: Supplementary file [file 301556-1.pdf]

## SUPPLEMENTAL FIGURE LEGENDS

**Figure S1: Map and photographs of shark strandings occurring in SF Bay in spring of 2017. A)** Map of SF Bay showing locations of stranded sharks and bat rays. (MSI) Marine Science Institute. (AOTB) Aquarium of the Bay. **(B-D)** Representative photographs of stranded leopard sharks around SF Bay taken between March and August 2017.

**Figure S2: Presence of *M. avidus* in CSF from additional shark species in SF Bay.** DNA samples from SF Bay sharks (S1, S2, and S3) and Southern California sharks (S4, S5) were tested by PCR using universal primers for the ciliate *cox1* gene (expected size 700bp), and nested primers specific to the *cox1* gene of *M. avidus* (expected size 422bp). Presence of shark DNA was assessed with universal shark rDNA primers (expected 1.3-1.6kb). (NTC) indicates no-template control. M: 100bp (Universal ciliate and *M. avidus*), or 1kb+ (Universal shark) ladder.

**Figure S3: Absence of non-*M. avidus* pathogenic ciliates in CSF from leopard sharks in SF Bay.** DNA samples from SF Bay leopard sharks (LS1-12) and negative control animals (bat ray (BR) and S4) were tested by PCR using universal primers for the ciliate *cox1* gene (expected size 700bp, arrow), and nested primers specific to the *cox1* gene of *Pseudocohnilembus longisietus* (expected size 341bp), *Pseudocohnilembus persalinus* (expected size 229bp), and *Uronema marinum* (expected size 285bp). Positive controls for *P. longisietus*, *P. persalinus*, and *U. marinum* were unavailable. Presence of shark DNA was assessed with universal shark rDNA primers (expected 1.3-1.6kb). (+) marks samples where amplification with primers specific to the *cox1* gene of *M. avidus* produced a band of the expected size (see Figure 2A). M: 100bp (Universal ciliate), 25bp (species-specific), or 1kb+ (Universal shark) ladder.

**Figure S4: Absence of *M. avidus* in CSF from leopard sharks in Southern California.** DNA samples from leopard sharks from Southern California (LS13-16) and a positive control SF Bay leopard shark (LS11) were tested by nested PCR using primers specific to the *cox1* gene of *M. avidus* (expected size 422bp). (NTC) indicates no-template control. Presence of shark DNA was assessed with universal shark rDNA primers (expected 1.3-1.6kb). M: 100bp (*M. avidus*) or 1kb+ (Universal shark) ladder.

**Figure S5: Presence of ciliate SSU sequence in SF Bay sharks.** DNA samples from leopard sharks (A) and other shark species (B) was amplified using universal ciliate ribosomal SSU primers (expected size 500bp, arrows). Bands above 1000bp and below 400bp likely represent non-specific amplification and did not reveal ciliate sequences by Sanger sequencing. (NTC) indicates no-template control reaction. M: 100bp ladder.

**Figure S6: Neighbor-joining phylogenetic trees from ribosomal RNA genes.** Trees were constructed from SSU rDNA (A) or LSU rDNA (B) nucleotide sequences of Philasterid species, using *Tetrahymena pyriformis* as the outgroup. New sequences in this study are in bold. See Tables S5 and S6 for reference sequence accession numbers. Nodes are labeled with bootstrap values based on 1,000 resamplings. Scale bar, nucleotide substitutions per site.

**Figure S7: Precipitation in regions draining to SF Bay.** Six-month cumulative precipitation (solid lines) ending in March of given year, in California Climate District 2 (Sacramento Drainage, black) and Climate District 5 (San Joaquin Drainage, grey). Mean October-March precipitation values for 1901-2000 plotted as baseline (dashed lines). Map of California (right) shows climate districts, respective to their outflow into SF Bay (star). Red highlights years with abnormal shark deaths in the spring. Precipitation data from NOAA National Centers for Environmental Information.

Fig. S1

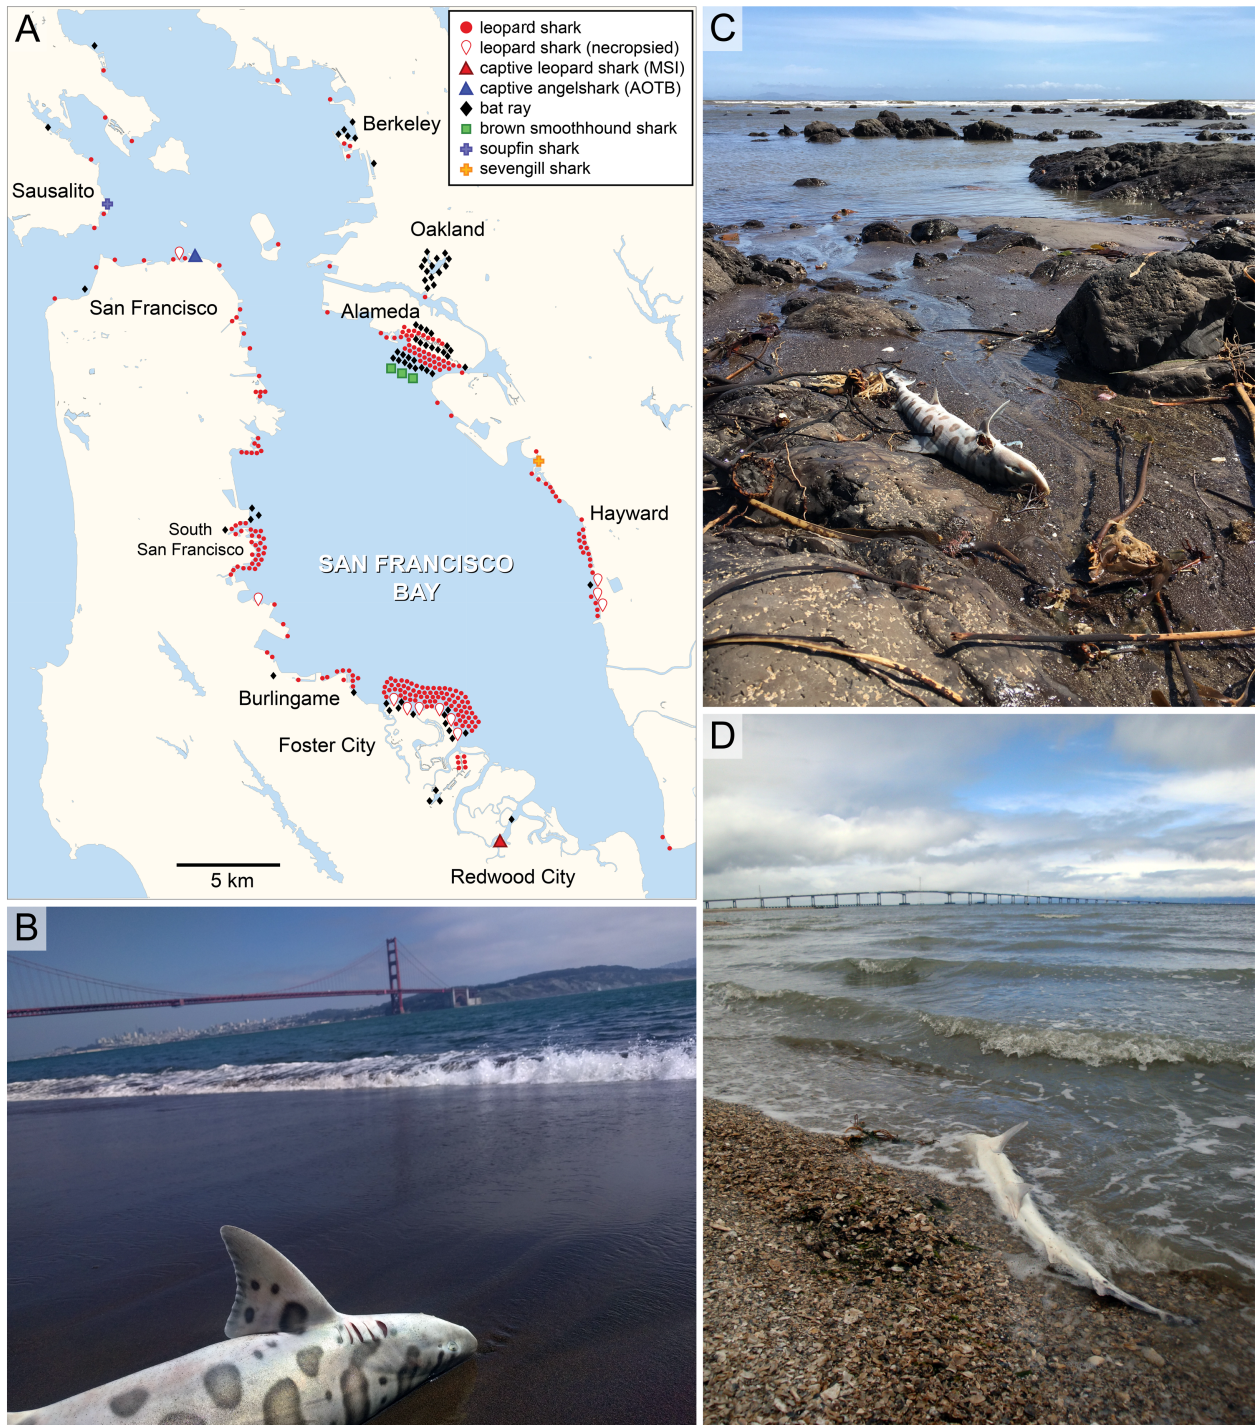

Fig. S2

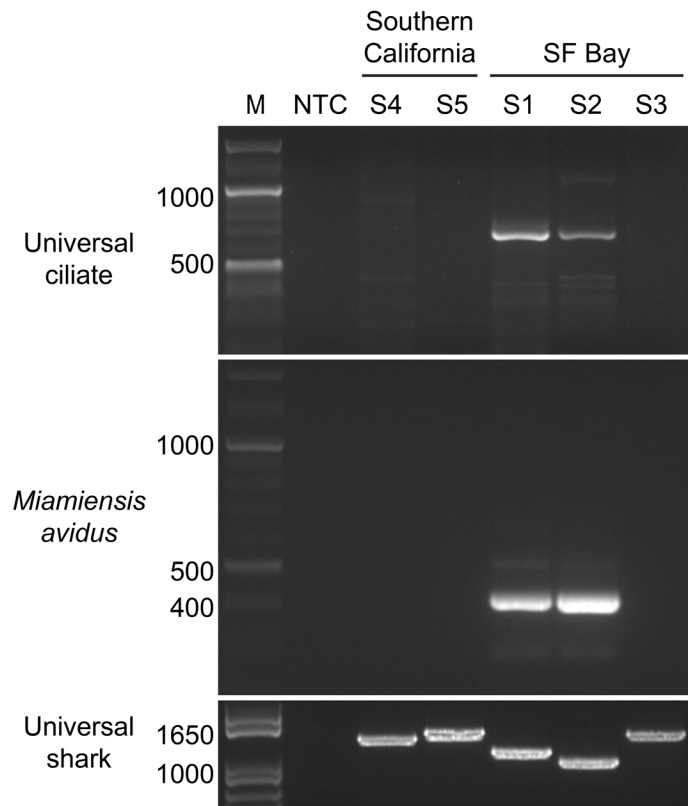

Fig. S3

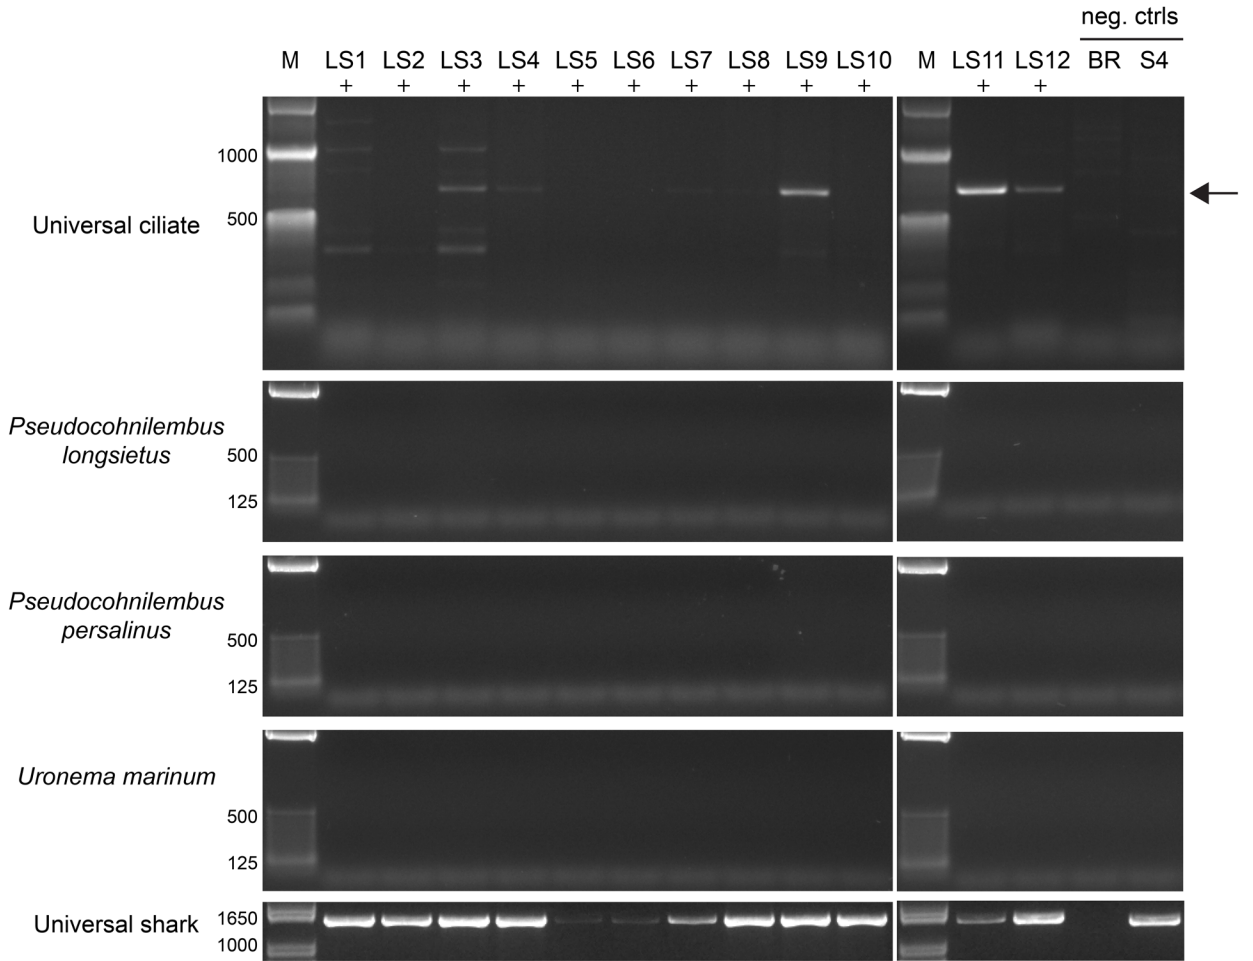



Fig. S4

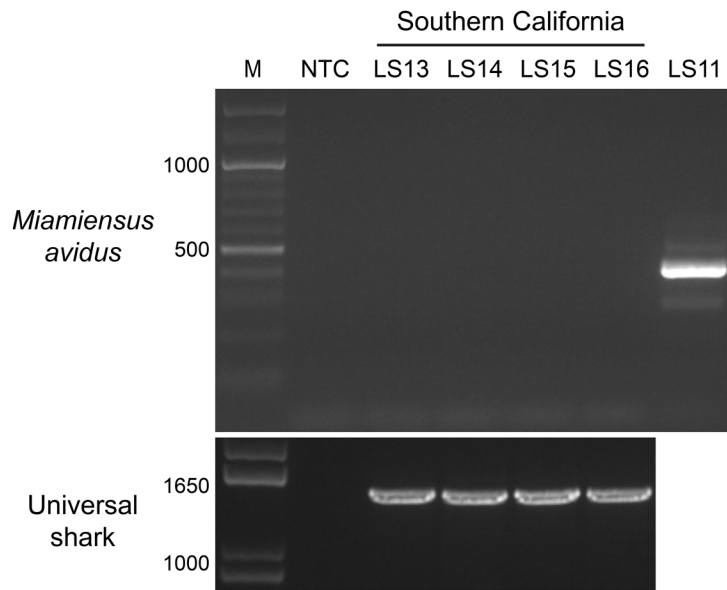

Fig. S5

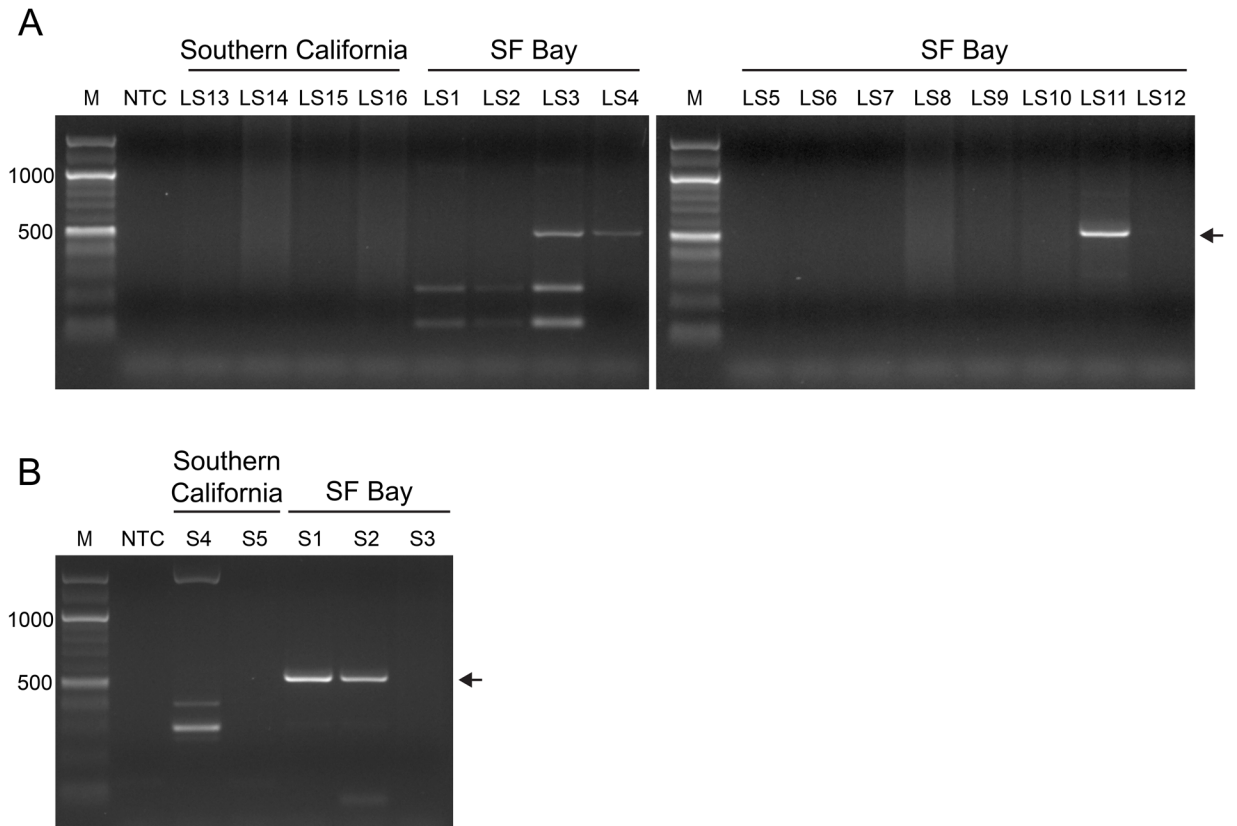

Fig. S6

A

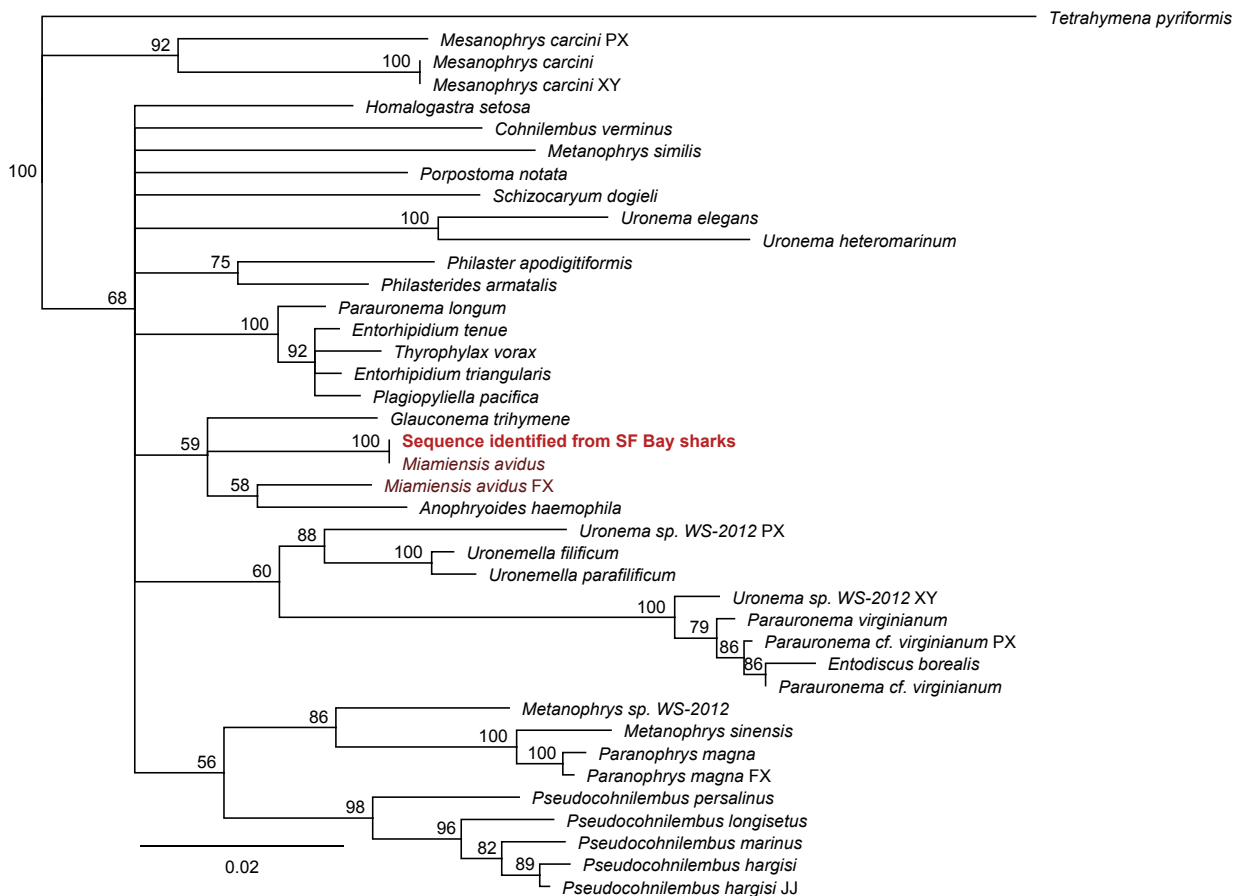

B

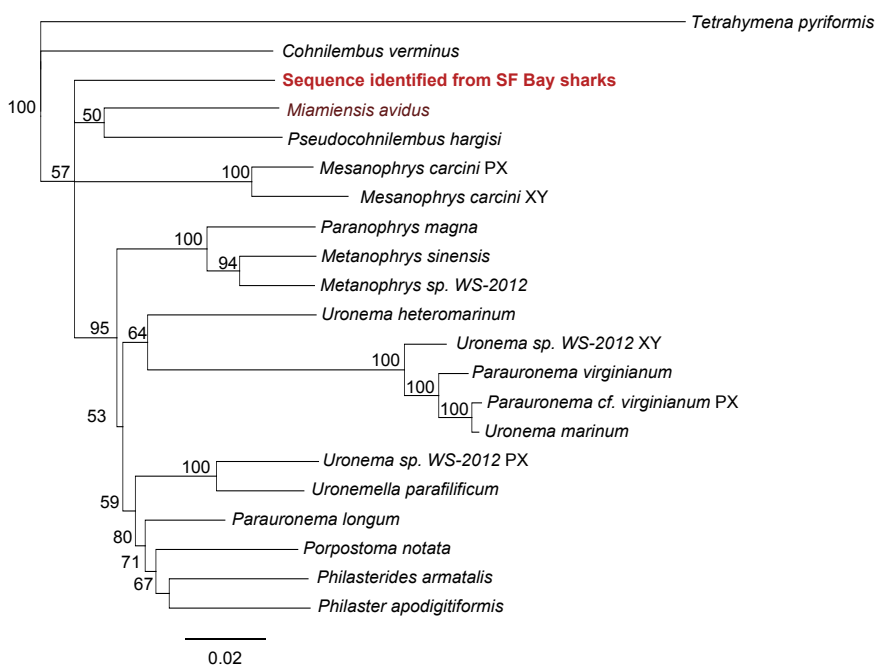

Fig. S7

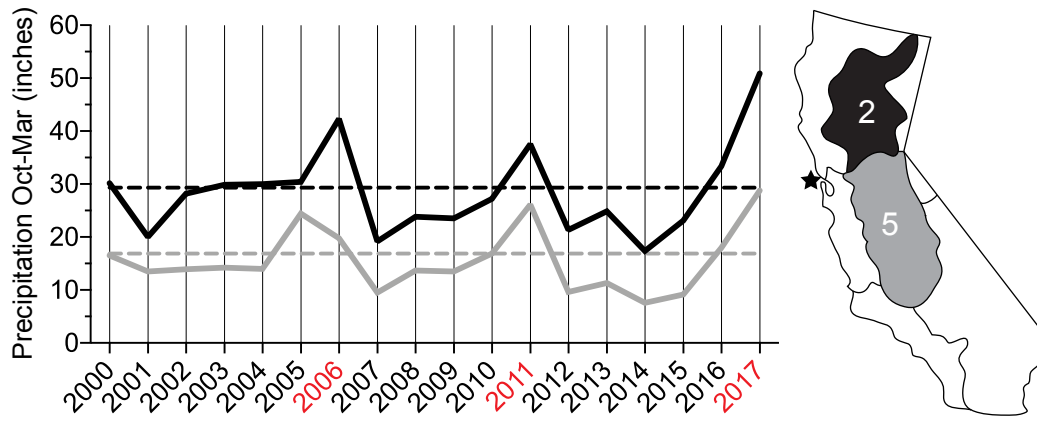



**Table S1. Specimen details**

\* captive shark on display in aquaria. Est = estimated. ND = not determined. M = male, F = female.

|                                | Fish ID                       | Shark Species                 | Stranding / Collection Date | Necropsy Date | Total Length (cm) | Fork Length (cm) | Body Weight (kg) | Sex |
|--------------------------------|-------------------------------|-------------------------------|-----------------------------|---------------|-------------------|------------------|------------------|-----|
| Stranded sharks from SF Bay    | LS01                          | <i>Triakis semifasciata</i>   | 4/9/17                      | 4/12/17       | 125.1             | 109.9            | 8.85             | M   |
|                                | LS02                          | <i>Triakis semifasciata</i>   | 4/15/17                     | 4/17/17       | 122.5             | 106.3            | 7.94             | M   |
|                                | LS03                          | <i>Triakis semifasciata</i>   | 4/25/17                     | 4/25/17       | 113.7             | 95.9             | 5.25             | M   |
|                                | LS04                          | <i>Triakis semifasciata</i>   | 4/25/17                     | 4/25/17       | 49.5              | 42.5             | 0.25             | M   |
|                                | LS05                          | <i>Triakis semifasciata</i>   | 4/25/17                     | 4/25/17       | 111.8             | 96.5             | 5.25             | M   |
|                                | LS06                          | <i>Triakis semifasciata</i>   | 4/25/17                     | 4/25/17       | 73.0              | 62.9             | 1.50             | M   |
|                                | LS07                          | <i>Triakis semifasciata</i>   | 4/25/17                     | 4/25/17       | 48.3              | 41.3             | 0.25             | M   |
|                                | LS08                          | <i>Triakis semifasciata</i>   | 4/26/17                     | 4/27/17       | 96.7              | 85.2             | 3.52             | M   |
|                                | LS09                          | <i>Triakis semifasciata</i>   | 4/26/17                     | 4/28/17       | 69.9              | 59.7             | 1.50             | M   |
|                                | LS10                          | <i>Triakis semifasciata</i>   | 5/2/17                      | 5/3/17        | 100.5             | 88.3             | 3.88             | M   |
|                                | LS11                          | <i>Triakis semifasciata</i>   | 5/13/17                     | 5/16/17       | 96.0              | 82.5             | 3.12             | F   |
|                                | LS12                          | <i>Triakis semifasciata</i> * | 5/23/17                     | 5/24/17       | 66.4              | 58.4             | 1.05             | F   |
|                                | S1                            | <i>Squatina californica</i> * | 5/17/17                     | 5/18/17       | ND                | ND               | ND               | ND  |
| S2                             | <i>Notorynchus cepedianus</i> | 5/17/17                       | 5/20/17                     | 293.4         | ND                | 100 (est.)       | M                |     |
| S3                             | <i>Galeorhinus galeus</i>     | 7/5/17                        | 7/11/17                     | 177.0         | ND                | 22.50            | M                |     |
| Controls from Central/South CA | LS13                          | <i>Triakis semifasciata</i>   | 7/18/17                     | 7/20/17       | 128.7             | 113.2            | 10.20            | M   |
|                                | LS14                          | <i>Triakis semifasciata</i>   | 7/18/17                     | 7/20/17       | 85.2              | 75.0             | 2.72             | F   |
|                                | LS15                          | <i>Triakis semifasciata</i>   | 7/18/17                     | 7/20/17       | 73.2              | 65.0             | 1.81             | M   |
|                                | LS16                          | <i>Triakis semifasciata</i>   | 7/18/17                     | 7/20/17       | 82.9              | 72.7             | 2.45             | F   |
|                                | S4                            | <i>Carcharodon carcharias</i> | 4/8/17                      | 4/9/17        | 299.7             | 279.4            | 310.00           | M   |
| S5                             | <i>Galeorhinus galeus</i>     | 5/24/17                       | 5/25/17                     | 185.0         | 160.0             | ND               | F                |     |

**Table S2: mNGS findings**

Details on metagenomic Next-Generation Sequencing (mNGS) performed using RNA extracted from CSF of sharks from SF Bay or from Southern /Central California, or using no-template controls (NTC). [1] Number of unprocessed read pairs. [2] Credible shark pathogens identified in metagenomic analysis. [3] Number of read pairs assigned to Ciliophora (TaxID 5878). [4] Ciliophora reads as in [3], expressed as reads per million raw reads (rpm). \* *Mortierella alpina* was identified, but pathogenicity is uncertain.

|                             | Fish ID | Shark Species                 | Raw reads [1] | Credible pathogen [2] | Ciliophora reads [3] | Ciliophora rpm [4] |
|-----------------------------|---------|-------------------------------|---------------|-----------------------|----------------------|--------------------|
| Stranded sharks from SF Bay | LS08    | <i>Triakis semifasciata</i>   | 676,814       | Scuticociliate        | 979                  | 1446               |
|                             | LS10    | <i>Triakis semifasciata</i>   | 974,483       | Scuticociliate        | 1477                 | 1516               |
|                             | LS12    | <i>Triakis semifasciata</i>   | 1,555,887     | Scuticociliate        | 349                  | 224                |
|                             | S1      | <i>Squatina californica</i>   | 760,593       | Scuticociliate        | 773                  | 1016               |
|                             | S2      | <i>Notorynchus cepedianus</i> | 2,393,172     | Scuticociliate        | 154                  | 64                 |
| Southern/<br>Central CA     | S4      | <i>Carcharodon carcharias</i> | 558,798       | None*                 | 0                    | 0                  |
|                             | S5      | <i>Galeorhinus galeus</i>     | 145,710       | None                  | 0                    | 0                  |
| NTC                         | n/a     | n/a                           | 3,826         | None                  | 0                    | 0                  |

**Table S3: Primers used in this study**

Degenerate nucleotides (D: A/G/T, H: A/C/T, M: A/C, R: A/G, W: A/T and Y: C/T) are underlined

| Primer name | Target                                   | Sequence (5' - 3')                                               | Amplicon size | Source     |
|-------------|------------------------------------------|------------------------------------------------------------------|---------------|------------|
| OX09-26     | Universal ciliate <i>cox1</i>            | G <u>D</u> TAY <u>T</u> TACAAGT <u>W</u> ATTACYGC <u>W</u> CATGG | 716-719 bp    | Whang 2013 |
| OX09-27     | Universal ciliate <i>cox1</i>            | TAA <u>A</u> ACYCTYCTATGYCTC <u>A</u> TACC                       |               |            |
| OX09-142    | <i>Miamiensis avidus cox1</i>            | AGTAATAATAGAACATTTAACGAATTTAATAACAC                              | 422 bp        | Whang 2013 |
| OX09-143    | <i>Miamiensis avidus cox1</i>            | CGTCTTGTAATTAATAAATTTGTAAACGATAC                                 |               |            |
| OX09-144    | <i>Uronema marinum cox1</i>              | AACATAGAGCATATAGAGAGTACTCTAA                                     | 285 bp        | Whang 2013 |
| OX09-145    | <i>Uronema marinum cox1</i>              | TTCATCCAGCTGTTGTTAATGT                                           |               |            |
| OX09-146    | <i>Pseudocohnilembus persalinus cox1</i> | TAAATCTAATCATCGTAATAATAGAGAATTGTTAG                              | 229 bp        | Whang 2013 |
| OX09-147    | <i>Pseudocohnilembus persalinus cox1</i> | CTTATCGATACGACTAACTGCAT                                          |               |            |
| OX09-148    | <i>Pseudocohnilembus longisetus cox1</i> | AAATCAAATCATAGAAATAATAGAGAATTTTTAAATG                            | 341 bp        | Whang 2013 |
| OX09-149    | <i>Pseudocohnilembus longisetus cox1</i> | GCTCCAACACCAGTATATTTAATG                                         |               |            |
| Cil3        | Universal ciliate ribosomal SSU          | GTAGGCTCTTTACCTTGA                                               | ~500 bp       | Jung 2005  |
| Cil4        | Universal ciliate ribosomal SSU          | CAAATCACTCCACCAACT                                               |               |            |
| FISH5.8SF   | Universal shark ribosomal ITS2           | TTAGCGGTGGATCACTCGGCTCGT                                         | 1.3-1.6 kb    | Pank 2001  |
| FISH28SR    | Universal shark ribosomal ITS2           | TCCTCCGCTTAGTAATATGCTTAAATTCAGC                                  |               |            |

**Table S4: Mitochondrial cytochrome oxidase I (mt *cox1*) gene sequences used in this study.**

| <b>Taxonomic name</b>               | <b>Name in phylogenetic tree</b>         | <b>GenBank Accession No.</b> |
|-------------------------------------|------------------------------------------|------------------------------|
| <i>Miamiensis avidus</i>            | <i>Miamiensis avidus</i>                 | GQ855300                     |
|                                     | <i>Miamiensis avidus</i> strain A3       | EU831214                     |
|                                     | <i>Miamiensis avidus</i> strain Mie0301  | EU831233                     |
|                                     | <i>Miamiensis avidus</i> strain Nakajima | EU831226                     |
|                                     | <i>Miamiensis avidus</i> strain YK1      | EU831228                     |
|                                     | <i>Miamiensis avidus</i> strain YS3      | EU831218                     |
| <i>Pseudocohnilembus longisetus</i> | <i>Pseudocohnilembus longisetus</i>      | GQ500580                     |
| <i>Pseudocohnilembus persalinus</i> | <i>Pseudocohnilembus persalinus</i> GQ   | GQ500579                     |
|                                     | <i>Pseudocohnilembus persalinus</i> GU   | GU584095                     |
| <i>Tetrahymena pyriformis</i>       | <i>Tetrahymena pyriformis</i>            | EF070300                     |
| <i>Uronema marinum</i>              | <i>Uronema marinum</i>                   | GQ500578                     |



**Table S5. SSU-rDNA gene sequences used in this study**

| <b>Taxonomic name</b>               | <b>Name in phylogenetic tree</b>      | <b>GenBank Accession No.</b> |
|-------------------------------------|---------------------------------------|------------------------------|
| <i>Anophryoides haemophila</i>      | <i>Anophryoides haemophila</i>        | U51554                       |
| <i>Cohnilembus verminus</i>         | <i>Cohnilembus verminus</i>           | HM236339                     |
| <i>Entodiscus borealis</i>          | <i>Entodiscus borealis</i>            | AY541687                     |
| <i>Entorhipidium tenue</i>          | <i>Entorhipidium tenue</i>            | AY541688                     |
| <i>Entorhipidium triangularis</i>   | <i>Entorhipidium triangularis</i>     | AY541690                     |
| <i>Glauconema trihymene</i>         | <i>Glauconema trihymene</i>           | GQ214552                     |
| <i>Homalogastra setosa</i>          | <i>Homalogastra setosa</i>            | EF158848                     |
| <i>Mesanophrys carcini</i>          | <i>Mesanophrys carcini</i>            | AY103189                     |
|                                     | <i>Mesanophrys carcini</i> PX         | JN885085                     |
|                                     | <i>Mesanophrys carcini</i> XY         | JN885086                     |
| <i>Metanophrys similis</i>          | <i>Metanophrys similis</i>            | AY314803                     |
| <i>Metanophrys sinensis</i>         | <i>Metanophrys sinensis</i>           | HM236336                     |
| <i>Metanophrys sp. WS-2012</i>      | <i>Metanophrys sp. WS-2012</i>        | JN885084                     |
| <i>Miamiensis avidus</i>            | <i>Miamiensis avidus</i>              | AY550080                     |
|                                     | <i>Miamiensis avidus</i> FX           | JN885091                     |
| <i>Paranophrys magna</i>            | <i>Paranophrys magna</i>              | AY103191                     |
|                                     | <i>Paranophrys magna</i> FX           | JN885089                     |
| <i>Parauronema virginianum</i>      | <i>Parauronema cf. virginianum</i>    | FJ595488                     |
|                                     | <i>Parauronema cf. virginianum</i> PX | JN885082                     |
|                                     | <i>Parauronema virginianum</i>        | JN885087                     |
| <i>Parauronema longum</i>           | <i>Parauronema longum</i>             | HM236338                     |
| <i>Philaster apodigitiformis</i>    | <i>Philaster apodigitiformis</i>      | FJ648350                     |
| <i>Philasterides armatalis</i>      | <i>Philasterides armatalis</i>        | FJ848877                     |
| <i>Plagiopyliella pacifica</i>      | <i>Plagiopyliella pacifica</i>        | AY541685                     |
| <i>Porpostoma notata</i>            | <i>Porpostoma notata</i>              | HM236335                     |
| <i>Pseudocohnilembus hargisi</i>    | <i>Pseudocohnilembus hargisi</i>      | AY212806                     |
|                                     | <i>Pseudocohnilembus hargisi</i> JJ   | JN885090                     |
| <i>Pseudocohnilembus longisetus</i> | <i>Pseudocohnilembus longisetus</i>   | FJ899594                     |
| <i>Pseudocohnilembus marinus</i>    | <i>Pseudocohnilembus marinus</i>      | Z22880                       |
| <i>Pseudocohnilembus persalinus</i> | <i>Pseudocohnilembus persalinus</i>   | AY551906                     |
| <i>Schizocaryum dogieli</i>         | <i>Schizocaryum dogieli</i>           | AF527756                     |
| <i>Tetrahymena pyriformis</i>       | <i>Tetrahymena pyriformis</i>         | EF070254                     |
| <i>Thyrophylax vorax</i>            | <i>Thyrophylax vorax</i>              | AY541686                     |
| <i>Uronema elegans</i>              | <i>Uronema elegans</i>                | AY103190                     |
| <i>Uronema heteromarinum</i>        | <i>Uronema heteromarinum</i>          | FJ870100                     |
| <i>Uronema sp. WS-2012</i>          | <i>Uronema sp. WS-2012</i> PX         | JN885083                     |
|                                     | <i>Uronema sp. WS-2012</i> XY         | JN885088                     |
| <i>Uronemella filificum</i>         | <i>Uronemella filificum</i>           | EF486866                     |
| <i>Uronemella parafilificum</i>     | <i>Uronemella parafilificum</i>       | HM236337                     |

**Table S6. LSU-rDNA gene sequences used in this study**

| <b>Taxonomic name</b>            | <b>Name in phylogenetic tree</b>      | <b>GenBank Accession No.</b> |
|----------------------------------|---------------------------------------|------------------------------|
| <i>Cohnilembus verminus</i>      | <i>Cohnilembus verminus</i>           | JN885111                     |
| <i>Mesanophrys carcini</i>       | <i>Mesanophrys carcini</i> PX         | JN885112                     |
|                                  | <i>Mesanophrys carcini</i> XY         | JN885113                     |
| <i>Metanophrys sinensis</i>      | <i>Metanophrys sinensis</i>           | JN885114                     |
| <i>Metanophrys sp. WS-2012</i>   | <i>Metanophrys sp. WS-2012</i>        | JN885129                     |
| <i>Miamiensis avidus</i>         | <i>Miamiensis avidus</i> FX           | JN885115                     |
| <i>Paranophrys magna</i>         | <i>Paranophrys magna</i> FX           | JN885116                     |
| <i>Parauronema virginianum</i>   | <i>Parauronema cf. virginianum</i> PX | JN885117                     |
|                                  | <i>Parauronema virginianum</i>        | JN885128                     |
| <i>Parauronema longum</i>        | <i>Parauronema longum</i>             | JN885118                     |
| <i>Philaster apodigitiformis</i> | <i>Philaster apodigitiformis</i>      | JN885119                     |
| <i>Philasterides armatalis</i>   | <i>Philasterides armatalis</i>        | JN885120                     |
| <i>Porpostoma notata</i>         | <i>Porpostoma notata</i>              | JN885121                     |
| <i>Pseudocohnilembus hargisi</i> | <i>Pseudocohnilembus hargisi</i> JJ   | JN885122                     |
| <i>Tetrahymena pyriformis</i>    | <i>Tetrahymena pyriformis</i>         | X54004                       |
| <i>Uronema heteromarinum</i>     | <i>Uronema heteromarinum</i>          | JN885123                     |
| <i>Uronema marinum</i>           | <i>Uronema marinum</i>                | JN885124                     |
| <i>Uronema sp. WS-2012</i>       | <i>Uronema sp. WS-2012</i> XY         | JN885125                     |
|                                  | <i>Uronema sp. WS-2012</i> PX         | JN885126                     |
| <i>Uronemella parafilificum</i>  | <i>Uronemella parafilificum</i>       | JN885127                     |

## SUPPLEMENTAL METHODS

### Details on mNGS analysis

Due to the lack of complete shark genome sequences, subtraction of sequences aligning to the host organism was performed in two steps. First, paired end reads were aligned using the rapid aligner Spliced Transcripts Alignment to a Reference (STAR) (v2.5.1b) (Dobin et al. 2013) against a custom database containing the whole genome assembly of the elephant shark (*Callorhynchus milii*, RefSeq Assembly Accession: GCF\_000165045.1) and the mitochondrial genome of the great white shark (*Carcharodon carcharias*, NCBI Reference Sequence: NC\_022415.1); and secondly using the more stringent aligner Bowtie2 (v2.2.4) (Langmead and Salzberg 2012) in “very-sensitive-local” mode to align against a database built from the great white shark heart transcriptome (Sequence Read Archive at NCBI under the study accession number SRP016555 (Richards et al. 2013)), the elephant shark whole genome assembly (as above), and all nucleotide records in NCBI under taxonomy ID 7777 (class Chondrichthyes, aka cartilaginous fishes). Before the Bowtie2 alignment read pairs were quality filtered using PriceSeqFilter (v1.2) (Ruby, Bellare, and DeRisi 2013) with settings “-rqf 85 0.98 -rnf 90”, collapsed on a similarity of 95% using cd-hit-dup (v4.6.4) to remove PCR duplicates (Fu et al. 2012), and filtered for reads with <0.45 lzw compression ratio to remove reads with low complexity. After these steps, read pairs in which both mates remained unmapped were then passed on to GSNAPL (v2015-12-31) (Wu and Nacu 2010), which identified reads aligning to the NCBI nucleotide database (downloaded July 2015, indexed with k = 16mers, and preprocessed with RepeatMasker (vOpen-4.0; www.repeatmasker.org) to remove repetitive sequences). Finally, the same reads were aligned to the NCBI protein (non-redundant) database (July 2015) using the RapSearch2 algorithm (Zhao, Tang, and Ye 2012).

The interpretation of alignment results depended on identifying organisms in the samples from the epizootic that were dissimilar from the host, not seen in the water control, and unlikely to be commensal or a contaminant. Credible pathogens were also expected to be absent from samples taken from asymptomatic sharks outside the geographic area of the main leopard shark mortality event in SF Bay, and present in epizootic sharks at a conservative level of abundance (>20 non-redundant, mapped read pairs per million raw read pairs (rM) at the genus level based on nucleotide alignment).

To add confidence in the species determination of a putative eukaryotic pathogen, we assembled genomic regions commonly used in species identification, including the 18S small subunit (SSU) and 28S large subunit (LSU) of the nuclear ribosomal RNA locus (rDNA) as follows: unique, non-host read pairs were pooled from all samples containing reads that aligned to ciliates by the initial pipeline. These reads were then aligned against a custom database of all nucleotide records under taxonomy ID 5878 (phylum Ciliophora) using Bowtie (v2.2.4) (Langmead and Salzberg 2012). The aligning reads were *de novo* assembled using Geneious (Biomatters Ltd, v9.1.8), and contigs that aligned to the ciliate ribosomal DNA (rDNA) locus by nucleotide BLAST (BLASTn) (Altschul et al. 1990) were manually inspected for accuracy and read coverage (>4 unique read pairs coverage, >85% nucleotide identity). Final, high-confidence contigs for the ciliate SSU and LSU sequences were deposited in GenBank (Accession numbers MH062876, MH064355). Species-specific alignment for the SSU and LSU contigs was determined using BLASTn (Altschul et al. 1990).

- Altschul, Stephen F., Warren Gish, Webb Miller, Eugene W. Myers, and David J. Lipman. 1990. "Basic Local Alignment Search Tool." *Journal of Molecular Biology* 215 (3): 403–10. doi:10.1016/S0022-2836(05)80360-2.
- Dobin, Alexander, Carrie A Davis, Felix Schlesinger, Jorg Drenkow, Chris Zaleski, Sonali Jha, Philippe Batut, Mark Chaisson, and Thomas R Gingeras. 2013. "STAR: Ultrafast Universal RNA-Seq Aligner." *Bioinformatics (Oxford, England)* 29 (1): 15–21. doi:10.1093/bioinformatics/bts635.
- Fu, Limin, Beifang Niu, Zhengwei Zhu, Sitao Wu, and Weizhong Li. 2012. "CD-HIT: Accelerated for Clustering the next-Generation Sequencing Data." *Bioinformatics (Oxford, England)* 28 (23): 3150–52. doi:10.1093/bioinformatics/bts565.
- Langmead, Ben, and Steven L Salzberg. 2012. "Fast Gapped-Read Alignment with Bowtie 2." *Nature Methods* 9 (4): 357–59. doi:10.1038/nmeth.1923.
- Richards, Vincent P, Haruo Suzuki, Michael J Stanhope, and Mahmood S Shivji. 2013. "Characterization of the Heart Transcriptome of the White Shark (*Carcharodon Carcharias*)." *BMC Genomics* 14 (1): 697. doi:10.1186/1471-2164-14-697.
- Ruby, J. Graham, Priya Bellare, and Joseph L. DeRisi. 2013. "PRICE: Software for the Targeted Assembly of Components of (Meta) Genomic Sequence Data." *G3* 3 (5): 865–80. doi:10.1534/g3.113.005967.
- Wu, Thomas D, and Serban Nacu. 2010. "Fast and SNP-Tolerant Detection of Complex Variants and Splicing in Short Reads." *Bioinformatics (Oxford, England)* 26 (7): 873–81. doi:10.1093/bioinformatics/btq057.
- Zhao, Yongan, Haixu Tang, and Yuzhen Ye. 2012. "RAPSearch2: A Fast and Memory-Efficient Protein Similarity Search Tool for next-Generation Sequencing Data." *Bioinformatics (Oxford, England)* 28 (1): 125–26. doi:10.1093/bioinformatics/btr595.
